# Supplementary material for: Impact of COVID-19 on physical activity: A rapid review
Source: PubMed Central journal article supplement (PMC8979477; doi:10.7189/jogh.12.05003), 2022-04-30
Supplement: jogh-12-05003-s001.pdf [file jogh-12-05003-s001.pdf]

**Supplementary Table 1. Characteristics of the reviewed studies (n=61)**

| Ref. Number | 1 <sup>st</sup> author, publication year, field of publication | Study design (N/A: not specified or not reported) | Study location (L), setting (S)                                                                     | Sample size (N), age restriction structure (A), gender (G) | Confounding variables                                                                                                         | Environmental factors                                                                                                                                                                   | Physical activity outcome variables                                                                                                                                                                                                                                            | Statistical analysis                                                                                                             | Findings (O: significance, X: insignificance, Δ: counterintuitive N/A: not specified or not reported)                                                                            | Quality assessment results |
|-------------|----------------------------------------------------------------|---------------------------------------------------|-----------------------------------------------------------------------------------------------------|------------------------------------------------------------|-------------------------------------------------------------------------------------------------------------------------------|-----------------------------------------------------------------------------------------------------------------------------------------------------------------------------------------|--------------------------------------------------------------------------------------------------------------------------------------------------------------------------------------------------------------------------------------------------------------------------------|----------------------------------------------------------------------------------------------------------------------------------|----------------------------------------------------------------------------------------------------------------------------------------------------------------------------------|----------------------------|
| 77          | Beck, 2020, Transport                                          | Cross-sectional                                   | L= Australia; S= General/Not specified                                                              | N= 1073; A= 46.3±17.5; G= Both                             | Demographics (age, children, income); workplace policy; Shopping affected by COVID-19                                         |                                                                                                                                                                                         | <i>Objective and subjective measure</i><br>Household trips, use of active modes and motor vehicle                                                                                                                                                                              | Descriptive statistics; Regression models                                                                                        | N/A                                                                                                                                                                              | 6                          |
| 54          | Meyer, 2020, Public health                                     | Cross-sectional                                   | L= United States; S= General/Not specified                                                          | N = 3052; A= 18+; G= Both                                  | Demographics (gender, sex, race), BMI, Smoker, Marital Status, education, employment, chronic conditions, depression, anxiety |                                                                                                                                                                                         | <i>Subjective measure</i><br>Physical activity level, sitting time, screen time                                                                                                                                                                                                | Hedges' g effect sizes; confidence intervals; multivariable linear regressions                                                   | N/A                                                                                                                                                                              | 4                          |
| 57          | Moore, 2020, Nutrition and physical activity                   | Cross-sectional                                   | L= Canada; S= General/Not specified                                                                 | N=1472; A= 5-17; G= Both                                   | Demographics (parental/child and youth); current movement behaviors                                                           | Residential type (detached house) significant for outside PA (+), walking and biking (+), outside play (+), inside play (-), overall time outdoor (+), and family physical activity (+) | <i>Subjective measure</i><br>MVPA (days/week)<br>Child movement and play behaviors including outdoor play, outdoor PA/sports, walking and biking (days/week)<br>Screen time (hours/day)<br>Meeting the 24-h movement recommendation                                            | Descriptive statistics; Factorial analysis of variance/t-test; Chi-square; Pearson and point biserial correlation                | N/A                                                                                                                                                                              | 5                          |
| 20          | Srivastav, 2020, Global health                                 | Cross-sectional                                   | L=India; S= General/Not specified (sampling from Maharishi Markandeshwar (Deemed to be University)) | N= 143                                                     | Demographics (age, weight, gender)                                                                                            |                                                                                                                                                                                         | <i>Subjective measure</i><br>Vigorous physical activity (MET-min/week),<br>Moderate physical activity (MET-min/week),<br>Walking (MET-min/week)<br>Sitting (MET-min/week)<br>Total physical activity with and without sitting (MET-min/week)<br>Energy expenditure (kcal/week) | Wilcoxon signed rank test<br>Measurement: International Physical activity questionnaire-short form (IPAQ-SF); Kolmogorov-Smirnov | Vigorous physical activity (O)<br>Moderate physical activity (O)<br>Walking (O)<br>Sitting (O)<br>Total physical activity with and without sitting (O)<br>Energy expenditure (O) | 3                          |
| 41          | Park, 2020, Public health                                      | Cross-sectional                                   | L= Seoul, Korea; S= Urban                                                                           | N/A                                                        | N/A; only ridership data                                                                                                      |                                                                                                                                                                                         | <i>Objective measure</i><br>Change in Public Bike Sharing System (PBSS) usage per day                                                                                                                                                                                          | Independent t tests; difference-in-differences                                                                                   | Change in PBSS usage per day (O)                                                                                                                                                 | 4                          |

|    |                                                      |                 |                                                                                  |                                                           |                                                                                                                                                                                                    |                                                                                                                                                                                                                                   |                                                                                                                                                                                                                                                                                                                                            |                                                                                                                              |                                                                                                                                                                                                                                                       |   |
|----|------------------------------------------------------|-----------------|----------------------------------------------------------------------------------|-----------------------------------------------------------|----------------------------------------------------------------------------------------------------------------------------------------------------------------------------------------------------|-----------------------------------------------------------------------------------------------------------------------------------------------------------------------------------------------------------------------------------|--------------------------------------------------------------------------------------------------------------------------------------------------------------------------------------------------------------------------------------------------------------------------------------------------------------------------------------------|------------------------------------------------------------------------------------------------------------------------------|-------------------------------------------------------------------------------------------------------------------------------------------------------------------------------------------------------------------------------------------------------|---|
| 34 | Suzuki, 2020, Public health                          | Cross-sectional | L= Japan; S= Urban (patients in the hospital in Kure city, Hiroshima Prefecture) | N = 165; A= 78.6 ± 8.0; G: M=50, F=115                    | Social demographics; Subjective well-being (Use WHO-5-J); mental component health and health-related quality of life (HRQoL, use SF-12v2) ; Sidewalks; Risk factors associated with decreased PA   | Changes in PA since COVID-19 (NS): Residential density (high), access to shops (for good), sidewalks (for presence)                                                                                                               | <u>Subjective measure</u><br>Changes in PA, SWB, and HRQoL; also mentioned risk factors associated with decreased PA                                                                                                                                                                                                                       | Two-way repeated-measures ANOVA; paired t-test                                                                               | NA (only within each group; more active group, equally active group, less active group)                                                                                                                                                               | 4 |
| 55 | Lesser, 2020, Environment research and public health | Cross-sectional | L= Canada; S= Urban and suburban                                                 | N= 1098; A= over 19 G: M=215, F= 871                      | Active/Inactive Group; employment status; environment; Location; Childcare; associated barriers; facilitators                                                                                      | Natural relatedness and connectedness to nature (+): significantly greater connectedness to nature (Mdiff = 3.58, SD = 1.42, p = 0.012) and nature relatedness (Mdiff = 0.17, SD = 0.04, p < 0.001) than the inactive population; | <u>Subjective measure</u><br><b>Active vs Inactive groups</b><br>MVPA (min/week)<br>Changes in physical activity since COVID-19 (more/about the same/less)<br>Common types of physical activity<br>Change in type of activity since COVID-19 (very similar/somewhat similar/not so similar)<br>Godin Leisure Score (a leisure score index) | Sample t-tests; one-way ANOVAs                                                                                               | <b>Active vs Inactive groups</b><br>MVPA (NA)<br>Changes in physical activity since COVID-19 (O)<br>Change in type of activity since COVID-19 (very similar/somewhat similar/not so similar) (NA)<br>Godin Leisure Score (a leisure score index) (NA) | 5 |
| 58 | Gallè, 2020, Environment research and public health  | Cross-sectional | L= Italy; S= General/Not specified (sampling from Italian universities)          | N=1430; A= 22.9 ± 3.5; G: M= 494( 34.5%) , F= 936( 65.5%) | Socio-demographic features; specific conditions during lockdown; habits of doing housework, going grocery shopping and walking pets; parent's education level; previous PA level; Age, gender, BMI |                                                                                                                                                                                                                                   | <u>Subjective measure</u><br>Total sedentary time (min/day)<br>Total physical activity (min/week)                                                                                                                                                                                                                                          | The Wilcoxon Signed Ranks Test; Pearson's r value; logistic regression;                                                      | Total sedentary time (O)<br>Studying/working (O)<br>Watching TV/DVD (O)<br>Doing leisure activities (O)<br>Using electronic devices (O)<br>Total physical activity (O)                                                                                | 4 |
| 75 | Fong, 2020, Environment research and public health   | Cross-sectional | L= Hong Kong, China; S= Urban                                                    | N=590; All age; G: M= 217, F= 373                         | Demographics ( household members, educational level, working status, covering age, gender, average daily studying or                                                                               |                                                                                                                                                                                                                                   | <u>Subjective measure</u><br>Change in time spent to relax (e.g. doing leisure activities) - much decreased, decreased, no change, increased, much increased                                                                                                                                                                               | Chi-square test; multivariate regression models; ANOVA; t-test; Pearson's correlation coefficient; the internal consistency; | Change in time spent to relax (NA)                                                                                                                                                                                                                    | 4 |

|    |                                                             |                                     |                                                                                               |                                                                                   |                                                                                                                                                                                                            |                                                                                                                                                                                                                                                                                                                                                                                                                                                               |                                                                                                                                                                                                                                                                                                                                                                              |                                                                                                                                                     |                                                                                                                                                                                                                                                                             |   |
|----|-------------------------------------------------------------|-------------------------------------|-----------------------------------------------------------------------------------------------|-----------------------------------------------------------------------------------|------------------------------------------------------------------------------------------------------------------------------------------------------------------------------------------------------------|---------------------------------------------------------------------------------------------------------------------------------------------------------------------------------------------------------------------------------------------------------------------------------------------------------------------------------------------------------------------------------------------------------------------------------------------------------------|------------------------------------------------------------------------------------------------------------------------------------------------------------------------------------------------------------------------------------------------------------------------------------------------------------------------------------------------------------------------------|-----------------------------------------------------------------------------------------------------------------------------------------------------|-----------------------------------------------------------------------------------------------------------------------------------------------------------------------------------------------------------------------------------------------------------------------------|---|
|    |                                                             |                                     |                                                                                               |                                                                                   | working hours at home, changes in daily routines)                                                                                                                                                          |                                                                                                                                                                                                                                                                                                                                                                                                                                                               |                                                                                                                                                                                                                                                                                                                                                                              | Cronbach's alpha values of the multi-item scales                                                                                                    |                                                                                                                                                                                                                                                                             |   |
| 25 | Dunton, 2020, Public health                                 | Cross-sectional                     | L= United States; S= General/Not specified                                                    | N=211; A= (5-13) or 8.73±2.58 & older children (9-13); G: M= 100, F= 211          | Changes in locations of PA: at home or in the garage (+) and on sidewalks and roads in their neighborhood (+); park or trail (-); yard or driveway (NS), sidewalks and roads outside the neighborhood (NS) |                                                                                                                                                                                                                                                                                                                                                                                                                                                               | <i>Subjective measure</i><br>Physical activity (much more, somewhat more, about the same, somewhat less, much less);<br>Locations of Physical activity;<br>Sedentary behavior (much more, somewhat more, about the same, somewhat less, much less)                                                                                                                           | Descriptive statistics; Chi-square test; t-test; linear regression model; Ordinal logistic regression model; Generalized estimating equations (GEE) | Physical activity (O)<br>Locations of Physical activity (at home or in the garage (O), on sidewalks and roads in the neighborhood (O), at park or trail (O), in their yard or driveway (NS), on sidewalks and roads outside the neighborhood (NS)<br>Sedentary behavior (O) | 4 |
| 51 | Mitra, 2020, Health and place                               | Cross-sectional                     | L= Canada; S= Urban                                                                           | N=1472; A: group 1: 5-11 (53%), group 2: 12-17 (47%); G: M=780 (53%), F=692 (47%) | Demographics; Age; Meet MVPA; Sleep duration; Screen time; Household income; parent's employment; Multiple children; gender; dwelling type; dwelling density; access to park; distance to major roads      | <b>Correlates of increased outdoor activities:</b> house (ref. apartment) (+), dwelling density (-), access to park (NS), distance to major road (+), dwelling density x access to parks (+);<br><br><b>Correlates of increased outdoor activities by age group</b> (children vs. youth): house (+, children), dwelling density (-, both), access to parks (-, children), distance to major road (+, children), dwelling density x access to parks (+, youth) | <i>Subjective measure</i><br>Change in healthy behavior (descriptive; walk or bike, PA or sport outside, PA or sport inside, household chores, playing outside, playing inside, screen time, social media use, other non-screen based sedentary activities)<br><br><b>Increased vs decreased outdoor activities</b><br>Meet MVPA guidelines<br>Meet 24-h movement guidelines | Cluster analysis; Chi-square test; binomial logistic regression models; multivariate models                                                         | Walk or bike (NA)<br>Outdoor physical activity (NA)<br>Outdoor play (NA)<br>Screen time (NA)<br>Social media use (NA)<br>Non-screen based sedentary activities (NA)<br><br>Meet MVPA guidelines (NA)<br>Meet 24-h movement guidelines (NA)                                  | 6 |
| 29 | Romero-Blanco, 2020, Environment research and public health | Cross-sectional; Longitudinal study | L= Spain; S= General/Not specified (sampling from university students in campus residence and | N=213; A=N/A; G: M=41, F=172                                                      | Sociodemographic; Anxiety/depression (EuroQol 5D); Mediterranean diet; Living situation; Stage of change                                                                                                   |                                                                                                                                                                                                                                                                                                                                                                                                                                                               | <i>Subjective measure</i><br>Total PA (min/week)<br>Moderate PA (days/week)<br>Moderate PA (min/week)<br>Vigorous PA (days/week)<br>Vigorous PA (min/week)<br>Daily sitting time (minutes)                                                                                                                                                                                   | Bivariate analysis; Kolmogorov-Smirnov test; non-parametric Wilcoxon signed-rank test; Student-Fisher t-test;                                       | Total PA (O)<br>Moderate PA - days (O)<br>Moderate PA - mins (NS)<br>Vigorous PA - days (O)<br>Vigorous PA - mins (NS)<br>Daily sitting time (O)                                                                                                                            | 5 |

|    |                                                                 |                    |                                                                                                                                                                                                 |                                                |                                                                                                                                                                                             |                                                                                                                                                                                                             |                                                                                                                                                   |                                                                         |                                                                         |   |
|----|-----------------------------------------------------------------|--------------------|-------------------------------------------------------------------------------------------------------------------------------------------------------------------------------------------------|------------------------------------------------|---------------------------------------------------------------------------------------------------------------------------------------------------------------------------------------------|-------------------------------------------------------------------------------------------------------------------------------------------------------------------------------------------------------------|---------------------------------------------------------------------------------------------------------------------------------------------------|-------------------------------------------------------------------------|-------------------------------------------------------------------------|---|
|    |                                                                 |                    | shared apartments)                                                                                                                                                                              |                                                |                                                                                                                                                                                             |                                                                                                                                                                                                             |                                                                                                                                                   |                                                                         |                                                                         |   |
| 59 | Qi, 2020, Environment research and public health                | Cross-sectional    | L= China; S= Urban and suburban                                                                                                                                                                 | N=645; A= 31.8±8.6; G: M=250, F=395            | Demographic; relevant COVID-19; current PA;                                                                                                                                                 | Geographic classification: Suburb vs urban                                                                                                                                                                  | <u>Subjective measure</u><br>Sedentary time (h/day)<br>Total PA (participation frequency)                                                         | Descriptive analysis; ANOVA; Pearson's r; paired t-test                 | Sedentary time (O)<br>Total PA (O)                                      | 5 |
| 45 | Castañeda-Babarro, 2020, Environment research and public health | Cross-sectional    | L= Spain; S= General/Not specified                                                                                                                                                              | N=3800; A=18-64 ; G: M=2054(54%) , F=1746(46%) | Demographic; Subgroup: student, worker, student-worker, did nothing; Subgroup: BMI (underweight, normal, overweight, obese, extremely obese); Subgroup: PA level( vigorous PA, moderate PA) |                                                                                                                                                                                                             | <u>Subjective measure</u><br>Walking time<br>Moderate PA (categorical; min/week)<br>Vigorous PA (categorical; min/week)<br>Sedentary time (h/day) | T-test; chi-square test                                                 | Walking (O)<br>Moderate PA (O)<br>Vigorous PA (O)<br>Sedentary time (O) | 4 |
| 56 | López-Sánchez, 2020, Public health                              | Cross-sectional    | L= Spain; S= General/Not specified                                                                                                                                                              | N=163; A=18-64; G: M=47,F=117                  | Chronic conditions                                                                                                                                                                          |                                                                                                                                                                                                             | <u>Subjective measure</u><br>Moderate PA (min/day)<br>Vigorous PA (min/day)                                                                       | Kolmogorov-Smirnov test; Wilcoxon-signed rank test; Rosenthal's formula | Moderate PA (except age 45-54) (O)<br>Vigorous PA (NS)                  | 2 |
| 30 | Vetrovsky, 2020, Medical & heart failure                        | Cross-sectional    | L=Czech Republic; S= General/Not specified (patient life circumstances including living in a city with more/less than 10,000 inhabitants, walking distance to countryside less/more than 10min) | N=26; A= 58.8 ± 9.8; G: M=18, F=8              | Patient characteristics(age, gender, BMI, health assessments); Patient life circumstances                                                                                                   | Daily step count: living in a flat rather than in a house with garden (-) worsened; living in a city more vs less than 10,000 residents (NS), walking distance to countryside less vs more than 10 min (NS) | <u>Objective measure</u><br>Daily step count                                                                                                      | Linear mixed-effects models                                             | Daily step count (O)                                                    | 4 |
| 26 | Assaloni, 2020, Public Health                                   | Cross-sectional    | L= Italy; S= General/Not specified                                                                                                                                                              | N= 154; A= 44.8 ± 12.5 G: M=84, F=70           | Demographics (gender, race, age, marital status, basic anthropometrics (height/weight), BMI, HbA1c), socioeconomic (work, student, sedentary worker, active worker)                         |                                                                                                                                                                                                             | <u>Objective and subjective measure</u><br>Godin Scale Score (points)<br>Minutes of exercise (daily)<br>Steps number (daily)                      | Wilcoxon Signed Ranks test, t-test, Shapiro-Wilk test                   | Godin Scale Score (O)<br>Minutes of exercise (O)<br>Steps number (O)    | 4 |
| 32 | Pietrobelli, 2020, Public health                                | Longitudinal study | L= Italy; S= General/Not specified                                                                                                                                                              | N=41; A=13±3.1                                 | Demographics (age, height, weight BMI &                                                                                                                                                     |                                                                                                                                                                                                             | <u>Subjective measure</u><br>Screen time (h/day)<br>Sports (h/week)                                                                               | Paired t-test; independent two-sample t-tests                           | Screen time (O)<br>Sports (O)                                           | 4 |

|    |                                                             |                    |                                                                                                 |                                                               |                                                                                                                                                                                                             |                |                                                                                                                                                                                                |                                                                                                     |                                                                                                         |   |
|----|-------------------------------------------------------------|--------------------|-------------------------------------------------------------------------------------------------|---------------------------------------------------------------|-------------------------------------------------------------------------------------------------------------------------------------------------------------------------------------------------------------|----------------|------------------------------------------------------------------------------------------------------------------------------------------------------------------------------------------------|-----------------------------------------------------------------------------------------------------|---------------------------------------------------------------------------------------------------------|---|
|    |                                                             |                    |                                                                                                 | G: M=22,<br>F=19                                              | waist circumference); Meals, vegetable intake, fruit intake, potato chips, red meat, sugary drinks, screen time, sleep time, sports                                                                         |                |                                                                                                                                                                                                |                                                                                                     |                                                                                                         |   |
| 69 | Sun, 2020, Public health                                    | Cross-sectional    | L= Italy, Spain, Denmark, the UK, and the Netherland; S= General/Not specified                  | N= 1062; A= N/A; G= N/A                                       | Age, gender, body mass index (BMI), and educational background                                                                                                                                              |                | <i>Objective measure</i><br>Step counts (daily)<br>Max distance travelled from home (km)<br>Time spent at home (min)<br>Social app use (min)                                                   | Kruskal-Wallis tests; post-hoc Dunn's tests; Wilcoxon signed-rank                                   | Step counts (O)<br>Max distance travelled from home (O)<br>Time spent at home (O)<br>Social app use (O) | 6 |
| 35 | Cransac-Miet, 2020, Cardiology                              | Cross-sectional    | L= France; S= Urban and rural                                                                   | N=195; A=65.5±11.1; G: M=119 (61%), F=76 (39%)                | Urban and rural area                                                                                                                                                                                        | Urban vs rural | <i>Subjective measure</i><br>Total physical activity (>% decrease, No change, >25% increase)                                                                                                   | Chi square or Fisher exact test; Wilcoxon test;                                                     | Total physical activity (descriptive, significance between urban vs. rural)                             | 2 |
| 60 | Gilic, 2020, Children                                       | Cross-sectional    | L= Bosnia & Herzegovina; S= Urban and rural (65% in urban centers and 35% in rural communities) | N= 688; A=15-18; G: M=366 F=322                               | Sociodemographic variables; familial/parental factors                                                                                                                                                       |                | <i>Subjective measure</i><br>Physical activity levels (PAQ-A score)                                                                                                                            | Kolmogorov-Smirnov test; t-test; Mann Whitney U test; logistic regressions                          | Physical activity levels (O)                                                                            | 6 |
| 27 | Elran-Barak, 2020, Environmental research and public health | Cross-sectional    | L= Israel; S= General/Not specified                                                             | N=315; A=>18; G: M=121, F=178                                 | Demographic (gender, age, marital status); Socioeconomic variables (education, work status, religiosity, num of people in the household); Disease management; Time spent on social media; Medical condition |                | <i>Subjective measure</i><br>Time spent on social media (h/day)<br>Time spent on online health communities (h/day)<br>Physical activity (times/week) half an hour or more of physical activity | Chi-square test; one-way ANOVA with LSD post-hoc tests; Paired t-test; Ordinal logistic regressions | Time spent on social media (O)<br>Time spent on online health communities (O)<br>Physical activity (O)  | 3 |
| 32 | Di Sebastiano, 2020, Psychology                             | Cross-sectional    | L= Canada; S= General/Not specified                                                             | N=2388; A=over 18; G: M=234 (9.8%), F=2154 (90.2%)            | Demographic information (age, gender, region)                                                                                                                                                               |                | <i>Objective measure</i><br>MVPA (min/week)<br>LPA (min/week)<br>Steps (n/day)                                                                                                                 | Chi-square test; one-way ANOVA; two-way ANOVAs; partial eta-squared analysis                        | MVPA (O)<br>LPA (O)<br>Steps (O)                                                                        | 6 |
| 52 | Hemphill, 2020, Cardiology                                  | Longitudinal study | L= Canada; S= General/Not specified (children from British Columbia Children's Hospital)        | N=: 2019 group = 83, 2020 group=82; A= 13± 2.3; G: M=91, F=74 | Demographic (age, gender); Diagnosis (coarctation of the aorta, tetralogy of Fallot, transposition of the great arteries,                                                                                   |                | <i>Objective measure</i><br>Step counts (weekly and daily)                                                                                                                                     | Descriptive statistics; 1-way analysis of variance; student's t-test; chi-square test               | Step counts (O)                                                                                         | 5 |

|    |                                                       |                    |                                                                                                                                                               |                                                      |                                                                                                                                                                                                                                                                  |  |                                                                                                                                                                                                                                           |                                                                              |                                                                                                                  |   |
|----|-------------------------------------------------------|--------------------|---------------------------------------------------------------------------------------------------------------------------------------------------------------|------------------------------------------------------|------------------------------------------------------------------------------------------------------------------------------------------------------------------------------------------------------------------------------------------------------------------|--|-------------------------------------------------------------------------------------------------------------------------------------------------------------------------------------------------------------------------------------------|------------------------------------------------------------------------------|------------------------------------------------------------------------------------------------------------------|---|
|    |                                                       |                    |                                                                                                                                                               |                                                      | Fontan circulation)                                                                                                                                                                                                                                              |  |                                                                                                                                                                                                                                           |                                                                              |                                                                                                                  |   |
| 46 | Ammar, 2020, Nutrients, Public health                 | Cross-sectional    | L= Asia, African and Europe; S= General/Not specified                                                                                                         | N= 1047; A=18+; G: M=484, F=563                      | Demographic ( age, continent, gender, education, marital status, employment, health state)                                                                                                                                                                       |  | <u>Subjective measure</u><br>Vigorous PA (days/week, min/week, MET values)<br>Moderate PA (days/week, min/week, MET values)<br>Walking (days/week, min/week, MET values)<br>Total PA (days/week, min/week, MET values)<br>Sitting (h/day) | Shapiro–Wilks W-test; paired t-test; Cohen's d                               | Vigorous PA (O)<br>Moderate PA (O)<br>Walking (O)<br>Total PA (O)<br>Sitting (O)                                 | 5 |
| 66 | Gallè, 2020, Environmental research and public health | Cross-sectional    | L= Italy; S= General/Not specified (University: The University of Rome La Sapienza, the University of Naples Parthenope and the University of Bari Aldo Moro) | N=2125; A=22.5 ± 0.08; G: M=791, F=1334              | Demographic (age, gender); Life Science students and others; education; knowing someone affected by COVID-19                                                                                                                                                     |  | <u>Subjective measure</u><br>PA (decreased, increased, active as before, inactive as before)                                                                                                                                              | Descriptive analysis; student's t-test; chi-square test; logistic regression | PA (NA)                                                                                                          | 4 |
| 39 | Pépin, 2020, Medical                                  | Longitudinal study | L= Worldwide (15 countries); S= General/Not specified                                                                                                         | N= 742,000; Age and gender vary by country           | Age; Gender; Date of Lockdown; Country and province; Baseline and lockdown                                                                                                                                                                                       |  | <u>Objective measure</u><br>Steps (daily)                                                                                                                                                                                                 | Wilcoxon nonparametric test                                                  | Steps (O)                                                                                                        | 6 |
| 56 | López-Bueno, 2020, Psychology                         | Cross-sectional    | L= Spain; S= General/Not specified                                                                                                                            | N= 2741; A=34.2±13; G: M=1321(48.2 %) F=1420 (51.8%) | Demographic ( age, gender, education, marital status, occupation, body mass); exposure to COVID-19; Along during COVID-19 confinement; Number of previous health risk behaviors; Health risk behaviors during COVID-19 confinement; Week of COVID-19 confinement |  | <u>Subjective measure</u><br>Screen exposure (more than 2hrs of daily screen time; yes or no)<br>PA (<150 weekly minutes of MVPA; yes or no)                                                                                              | Binomial logistic regression tests; stratified analysis                      | Screen exposure (NS)<br>PA (O)                                                                                   | 4 |
| 62 | Azizi, 2020, Public health                            | Cross-sectional    | L= Morocco; S= General/Not specified                                                                                                                          | N=537; A=+18(33.19 ± 12.14);                         | socio-demographic characteristics (age, marital                                                                                                                                                                                                                  |  | <u>Subjective measure</u><br>Daily PA (none, less than 30min, 30min-1h, 1h-1h30min, 1h30min-2)                                                                                                                                            | Mann-Whitney and Kruskal-Wallis test; Stuart-Maxwell test                    | Daily PA (O)<br>Daily E-working time (O)<br>Daily information tracking time (O)<br>Daily phone calls and SMS (O) | 4 |

|    |                                              |                                               |                                                                                                                                 |                                 |                                                                                                                                                                                                          |  |                                                                                                                                                                                                                                                                                                                                                              |                                                        |                                                                                                                                                                        |   |
|----|----------------------------------------------|-----------------------------------------------|---------------------------------------------------------------------------------------------------------------------------------|---------------------------------|----------------------------------------------------------------------------------------------------------------------------------------------------------------------------------------------------------|--|--------------------------------------------------------------------------------------------------------------------------------------------------------------------------------------------------------------------------------------------------------------------------------------------------------------------------------------------------------------|--------------------------------------------------------|------------------------------------------------------------------------------------------------------------------------------------------------------------------------|---|
|    |                                              |                                               |                                                                                                                                 | G: M=199;<br>F=338              | status,<br>educational<br>status, profession,<br>socio economic<br>level, number of<br>children,<br>presence of<br>disease);<br>before home<br>confinement (484<br>sample), after<br>home<br>confinement |  | Daily E-working time<br>(none, less than 2 h, 2-4h,<br>4-6h, 6-8h, >8h)<br>Daily information<br>tracking time (none, less<br>than 30min, 30min-1h, 1-<br>2h, 2-3h, >3h)<br>Daily phone calls and<br>SMS (none, less than<br>30min, 30min-1h, 1-2h,<br>2-3h, >3h)<br>Daily activity time with<br>family members (none,<br>less than 1 h, 1-2h, 2-4h,<br>4-6h) |                                                        | Daily activity time with family<br>members (O)                                                                                                                         |   |
| 47 | Gallo,<br>2020, Nutrients                    | Cross-<br>sectional;<br>Longitudinal<br>study | L= Australia;<br>S= General/Not<br>specified<br>(sampling from<br>the University<br>of Queensland<br>in Brisbane,<br>Australia) | N= 509;<br>A= 19-27;<br>G=Both; | Demographics<br>(gender, age,<br>ethnicity); health<br>practices<br>( former physical<br>activity) ;                                                                                                     |  | <u>Subjective measure</u><br>physical activity level;<br>time of walking or<br>vigorous activity;<br>achieving 'sufficient'<br>activity                                                                                                                                                                                                                      | McNemar's test;<br>Shapiro-Wilk test                   | Levels of participation in PA (O);<br>Walking (O);<br>Vigorous PA (N/A); Sufficient PA<br>(O)                                                                          | 5 |
| 63 | Ruiz-Roso,<br>2020,<br>Nutrients             | Cross-<br>sectional<br>Study; 2020            | L= Spain, Italy,<br>Brazil, Chile,<br>Colombia;<br>S= General/Not<br>specified                                                  | N= 726;<br>A=10-19;<br>G=Both   | Sociodemographi<br>c (country, age,<br>sex, household<br>size, maternal<br>education);<br>health practices<br>(former physical<br>activity)                                                              |  | <u>Subjective measure</u><br>Physical activity<br>frequency                                                                                                                                                                                                                                                                                                  | Logistic regression                                    | country (o)<br>PA (o)                                                                                                                                                  | 5 |
| 28 | Sassone,<br>2020,<br>Public health           | Cross-<br>sectional<br>study                  | L= Italy;<br>S= General/Not<br>specified                                                                                        | N= 24;<br>A= 62-82;<br>G= Both  | Demographics<br>(gender, age)                                                                                                                                                                            |  | <u>Objective measure</u><br>Daily physical activity<br>hours                                                                                                                                                                                                                                                                                                 | Descriptive analysis                                   | Physical activity (O)                                                                                                                                                  | 2 |
| 48 | Zheng,<br>2020,<br>Public health             | Cross-<br>sectional;<br>Longitudinal<br>study | L= Hong Kong,<br>China;<br>S= Urban                                                                                             | N= 631;<br>A= 18-35;<br>G= Both | Demographics<br>(age, height,<br>weight, BMI);                                                                                                                                                           |  | <u>Subjective measure</u><br>Vigorous PA (min/day);<br>Moderate PA (min/day);<br>Walking (min/day);<br>Sedentary behavior<br>(h/day);<br>Sedentary behavior<br>including<br>TV/DVD (h/day),<br>Computer/paperwork<br>(h/day),<br>sitting for transport<br>(h/day)                                                                                            | Descriptive analysis;<br>Wilcoxon Signed-Rank<br>Test; | Vigorous PA (o);<br>Moderate PA (o);<br>Walking (o);<br>Sedentary behavior (o);<br>TV/DVD hours(o);<br>Computer/paperwork hours (o);<br>Sitting for transport hours(o) | 6 |
| 73 | Schnitzer,<br>2020,<br>Public health         | Cross-<br>sectional<br>study                  | L= Tyrol,<br>Austria;<br>S= General/Not<br>specified                                                                            | N= 511;<br>A= 25-59;<br>G= Both | Sociodemographi<br>c (Age,<br>gender,<br>location,<br>employment)                                                                                                                                        |  | <u>Subjective measure</u><br>Frequency of sports and<br>exercise                                                                                                                                                                                                                                                                                             | Descriptive analysis                                   | Sports and exercise behavior (NA)                                                                                                                                      | 3 |
| 40 | Park,<br>2020,<br>Medicine,<br>Public health | Cross-<br>sectional<br>study                  | L= Seoul,<br>Korea;<br>S= Urban                                                                                                 | N/A                             | Age, purpose                                                                                                                                                                                             |  | <u>Objective measure</u><br>Ridership change (daily<br>number of passengers)                                                                                                                                                                                                                                                                                 | Unpaired t-test                                        | Ridership change (o)                                                                                                                                                   | 5 |

|    |                                     |                       |                                                             |                                           |                                                                                                                                                     |  |                                                                                                                                                                                                                         |                                                                |                                                                                                                             |   |
|----|-------------------------------------|-----------------------|-------------------------------------------------------------|-------------------------------------------|-----------------------------------------------------------------------------------------------------------------------------------------------------|--|-------------------------------------------------------------------------------------------------------------------------------------------------------------------------------------------------------------------------|----------------------------------------------------------------|-----------------------------------------------------------------------------------------------------------------------------|---|
| 36 | Carroll, 2020, Nutrients            | Longitudinal study    | L= Guelph-Wellington area, Canada; S= General/Not specified | N= 254 (household); A= 18 month+; G= Both | Sociodemographic (ethnicity, household income, marital status)                                                                                      |  | <i>Subjective measure</i><br>Physical activity, Screen time                                                                                                                                                             | Descriptive analysis, Thematic analysis                        | PA (NA)<br>Screen time (NA)                                                                                                 | 4 |
| 74 | Phillipou, 2020, Public health      | Cross-sectional study | L= Australia<br>S= General/Not specified                    | N= 5469;<br>A= 18+;<br>G= Both;           | Demographics (age)                                                                                                                                  |  | <i>Subjective measure</i><br>Exercising behavior                                                                                                                                                                        | Descriptive statistics; Goodman-Kruskal gamma                  | Exercising behavior (NA)                                                                                                    | 3 |
| 21 | Ruiz-Roso, 2020, Medical, nutrients | Cross-sectional study | L= Madrid, Spain;<br>S= General/Not specified               | N= 72;<br>A= 45-77;<br>G= Both            | Demographics (gender, age, BMI, Capillary HbA1c)                                                                                                    |  | <i>Subjective measure</i><br>Sitting time (h/week)<br>Walking time (min/week)<br>Moderate PA (min/week)                                                                                                                 | Correlation test                                               | Sitting time (O)<br>Walking time (O)<br>Moderate PA (O)                                                                     | 4 |
| 64 | Bourdas, 2020, Public health        | Cross-sectional study | L= Greece;<br>S= General/Not specified                      | N= 5206;<br>A= 18+;<br>G= Both            | Demographics (age, weight, height);                                                                                                                 |  | <i>Subjective measure</i><br>Daily occupation (min/week);<br>Transportation (min/week);<br>Leisure time activities (min/week);<br>Sporting activities (min/week);<br>Overall PA (min/week)                              | Paired t-tests; One way ANOVA; Bonferroni pairwise comparisons | Daily occupation (o);<br>Transportation (o);<br>Leisure time activities (o);<br>Sporting activities (o);<br>Overall PA (o); | 6 |
| 44 | Saha, 2020, Public health           | Cross-sectional study | L= India;<br>S= General/Not specified                       | N/A                                       | N/A                                                                                                                                                 |  | <i>Objective measure</i><br>Daily change of different community mobility (percentage): Retail and recreation, Grocery and pharmacy, Parks, Transit stations, Workplaces, Residential                                    | Geo analysis                                                   | Daily change of different community mobility (NA)                                                                           | 4 |
| 65 | Sánchez-Sánchez, 2020, Nutrients    | Cross-sectional study | L= Spain<br>S= Urban and rural                              | N= 1073;<br>A= 16+;<br>G= Both            | Demographics (age, BMI, height, weight); Socio-economic (professional status, number of people in the residence, home cooking)                      |  | <i>Subjective measure</i><br>Practice of PA (weekly: 1-3 times, 4-5 times, 6+ times, do not practice any PA);<br>Time to spend practicing PA in each session (10-30min, 31min-1h, more than 1h, do not practice any PA) | Linear regression                                              | Practice of PA (o)<br>Time to spend practicing PA in each session (o)                                                       | 4 |
| 72 | Đogaš, 2020, Medical                | Cross-sectional study | L= Croatia,<br>S= General/Not specified                     | N=3027;<br>A=18+ ;<br>G= Both             | Demographics (age, body weight, height, education); Socio-economic (working status, work rhythm during lockdown, living conditions during lockdown) |  | <i>Subjective measure</i><br>Frequency of exercise weekly;<br>Duration of exercise (min)                                                                                                                                | Logistic regression                                            | Frequency of exercise (o);<br>Duration of exercise (o)                                                                      | 4 |



|    |                                         |                       |                                                                                                                             |                                  |                                                                                                                                                                                                 |  |                                                                                                                                                                                                                                           |                                                                          |                                                                                                                                                                      |   |
|----|-----------------------------------------|-----------------------|-----------------------------------------------------------------------------------------------------------------------------|----------------------------------|-------------------------------------------------------------------------------------------------------------------------------------------------------------------------------------------------|--|-------------------------------------------------------------------------------------------------------------------------------------------------------------------------------------------------------------------------------------------|--------------------------------------------------------------------------|----------------------------------------------------------------------------------------------------------------------------------------------------------------------|---|
| 68 | Canello, 2020,<br>Public health         | Cross-sectional study | L= Italy;<br>S= General/Not specified                                                                                       | N=490;<br>A=18+;<br>G= Both      | Demographics (gender, age, BMI, educational level, work situation, house size, cohabitation, relatives/himself with COVID-19; habitual physical activity levels food smokers; chronic diseases; |  | <i>Subjective measure</i><br>PA (unchanged, more than usual, no activity, less than usual),<br>PA change in percentage (increased, decreased, unchanged, sedentary; active subjects before lockdown vs inactive subjects before lockdown) | Descriptive statistics                                                   | Physical activity (o)                                                                                                                                                | 4 |
| 22 | Biviá-Roig ,<br>2020 ,<br>Public health | Cross-sectional study | L=Spain;<br>S=General/Not specified                                                                                         | N=90;<br>A=18+;<br>G= Both       | Demographics (Age, height, weight, BMI, week of pregnancy, parity)                                                                                                                              |  | <i>Subjective measure</i><br>Changes in PA (days per week, min per day),<br>sedentary activity (hours per day)                                                                                                                            | Shapiro–Wilk test;<br>nonparametric Wilcoxon tests;<br>Chi-square tests  | Vigorous activity (o);<br>Vigorous activity (o);<br>Moderate activity (o);<br>Moderate activity (o);<br>Walking activity (o);<br>Walking activity (o)<br>Sitting (o) | 3 |
| 42 | Constandt,<br>2020,<br>Public health    | Cross-sectional study | L= Belgium;<br>S= General/Not specified                                                                                     | N=13515;<br>A=18+;<br>G= Both    | Demographics (Age, gender, highest education, inhouse children);<br>Exercise performance (High active, low active)                                                                              |  | <i>Subjective measure</i><br>High vs low active groups<br>Exercise during lockdown, including three categories: i.e., exercising less, exercising as much, exercising more                                                                | Descriptive analysis;<br>ordinal logistic regression                     | High vs low active groups<br>Exercise during lockdown (NA)                                                                                                           | 5 |
| 49 | Pisot,<br>2020,<br>Public health        | Cross-sectional study | L=Bosnia and Herzegovina, Croatia, Greece, Kosovo, Italy, Serbia, Slovakia, Slovenia and Spain;<br>S= General/Not specified | N=4108;<br>A=15-82;<br>G= Both   | Demographics (age, gender, country)                                                                                                                                                             |  | <i>Subjective measure</i><br>by country:<br>Physical inactivity (h/day)<br>Screen time (h/day),<br>Walking time (h/day),<br>Sports time (h/day),<br>Physical work time (h/day)                                                            | Descriptive analysis;<br>Multiple Linear Regression                      | by country:<br>Physical inactivity (o);<br>Screen time (o);<br>Walking time (o);<br>Sports time (o);<br>Physical work time (Δ)                                       | 4 |
| 23 | Di Stefano,<br>2020,<br>Medical         | Cross-sectional study | L=Sicily, Italy<br>S=General/Not specified                                                                                  | N=268;<br>A=18+,<br>G= Both      | Demographics (age; gender; BMI)<br>Levels of PA(MET)                                                                                                                                            |  | <i>Subjective measure</i><br>Healthy controls and patients with neuromuscular disease<br>MET-vigorous (min/week);<br>MET-moderate (min/week);<br>MET-walking (min/week);<br>MET-total (min/week);<br>MET-MVPA (min/week);                 | Chi-square test;<br>Mann–Whitney U test;<br>Kruskal–Wallis rank-sum test | MET-vigorous (o);<br>MET-moderate (o);<br>MET-walking (o);<br>MET-total (o);<br>MET-MVPA (o)                                                                         | 3 |
| 53 | Ong,<br>2020,<br>Medical                | Cross-sectional study | L= Singapore;<br>S= Urban                                                                                                   | N= 1824;<br>A= 21–40;<br>G= Both | Sociodemographic (age, gender, ethnicity, family status, household                                                                                                                              |  | <i>Objective measure</i><br>Steps (daily counts);<br>MVPA (min/day);<br>Resting heart rate (bpm)                                                                                                                                          | Paired t-test;<br>Pearson’s chi-squared test;<br>ANOVA                   | Steps (o);<br>MVPA (o);<br>Resting heart rate (o)                                                                                                                    | 6 |

|    |                                    |                       |                                      |                                                                                                 |                                                                                                                                                           |  |                                                                                                                                                                                               |                                                                          |                                                                                                                                                             |   |
|----|------------------------------------|-----------------------|--------------------------------------|-------------------------------------------------------------------------------------------------|-----------------------------------------------------------------------------------------------------------------------------------------------------------|--|-----------------------------------------------------------------------------------------------------------------------------------------------------------------------------------------------|--------------------------------------------------------------------------|-------------------------------------------------------------------------------------------------------------------------------------------------------------|---|
|    |                                    |                       |                                      |                                                                                                 | income in SGD, highest education)                                                                                                                         |  |                                                                                                                                                                                               |                                                                          |                                                                                                                                                             |   |
| 71 | Colley, 2020, Public health        | Cross-sectional study | L= Canada; S= General/Not specified  | N= 4627; A= 20+; G= Both                                                                        | Demographics (age, gender)                                                                                                                                |  | <u>Subjective measure</u><br>Men vs Women:<br>Exercise outdoors (yes/no);<br>Increased TV use;<br>Increased internet use;<br>Increased video games use;<br>Increased 2-3 types of screens use | Descriptive statistics;<br>Paired t-tests;                               | Men vs Women<br>Exercise outdoors (NA)<br>Increased TV (NA)<br>Increased internet (NA)<br>Increased video games (NA)<br>Increased 2-3 types of screens (NA) | 3 |
| 50 | Yang, 2020, Public health          | Longitudinal study    | L= USA; S= General/Not specified     | N= 431; A= 18+; G= Both                                                                         | Demographics (age, gender, BMI, education levels, marital status, income, employment, ethnicity); Covid-19 related symptoms; Tested for Covid-19 (yes/no) |  | <u>Subjective measure</u><br>PA MET (MET-min/week);<br>Moderate PA (min/day);<br>Vigorous PA (min/day);<br>Active PA (min/day);<br>Walking (min/day);<br>Sedentary time (min/day)             | Descriptive statistics;<br>Linear regression analyses                    | PA MET (o);<br>Moderate PA (o);<br>Vigorous PA (o);<br>Active PA (o);<br>Walking (NA);<br>Sedentary time (NA)                                               | 6 |
| 37 | Ghosh, 2020, Medical               | Cross-sectional study | L= India; S= Urban                   | N=150; A= 18+; G= Both                                                                          | Demographics (age, gender)                                                                                                                                |  | <u>Subjective measure</u><br>Exercise duration (decreased by 25-50%, same as before, increased by 25%, increased by >50%); compared to before lockdown period                                 | Descriptive statistics                                                   | Exercise duration (NA)                                                                                                                                      | 1 |
| 79 | Day, 2020, Environmental economics | Cross-sectional study | L= England; S= General/Not specified | N/A                                                                                             | N/A                                                                                                                                                       |  | <u>Objective measure</u><br>Park visitation change (daily %)                                                                                                                                  | Latent class regression analysis                                         | Park visitation change (NA)                                                                                                                                 | 5 |
| 33 | Majumdar, 2020, Medical            | Cross-sectional study | L= India; S= General/Not specified   | Office Workers N=203<br>A: 33.1±7.11;G= Both<br><br>Students N=325;<br>A: 22.1±1.66;<br>G= Both | Demographics (age, job experience, sex, marital status, habitual smokers, habitual drinkers)                                                              |  | <u>Subjective measure</u><br>Office workers and students;<br>Cellphone time (h/day);<br>Desktop/laptop time (h/day);<br>TV time (h/day)                                                       | Student's t-test                                                         | Cellphone (o),<br>Desktop/laptop (o),<br>TV (o)                                                                                                             | 3 |
| 78 | Van Nguyen, 2020, Public health    | Cross-sectional study | L= Vietnam; S= General/Not specified | N=440; A=N/A<br>G= Both                                                                         | Sociodemographic (gender, household head's occupation, extra job participation, monthly income, location)                                                 |  | <u>Subjective measure</u><br>Travel plans;<br>Moving habits;<br>Work/study activities;                                                                                                        | Descriptive statistics;<br>explanatory factor analysis;<br>Barlett test; | Travel plans (NA);<br>Moving habits (NA);<br>Work/study activities (NA)                                                                                     | 3 |

|    |                                   |                          |                                            |                                                                            |                                                                                                                                                                                                                                                                               |  |                                                                                                                                                                                                                                                                                 |                                                                                                                                                     |                                                                                                                                                                                                              |   |
|----|-----------------------------------|--------------------------|--------------------------------------------|----------------------------------------------------------------------------|-------------------------------------------------------------------------------------------------------------------------------------------------------------------------------------------------------------------------------------------------------------------------------|--|---------------------------------------------------------------------------------------------------------------------------------------------------------------------------------------------------------------------------------------------------------------------------------|-----------------------------------------------------------------------------------------------------------------------------------------------------|--------------------------------------------------------------------------------------------------------------------------------------------------------------------------------------------------------------|---|
| 67 | Yamada, 2020, Public health       | Cross-sectional study    | L= Japan; S= General/Not specified         | N=500; A=20+; G = Both                                                     | Demographics (age, gender)                                                                                                                                                                                                                                                    |  | <i>Subjective measure</i><br>Frequency of outing (%; decrease no change, increase);<br>PA (%; decrease no change, increase);<br>Sedentary behavior (%; decrease no change, increase)                                                                                            | Descriptive statistics                                                                                                                              | Frequency of outing (NA);<br>PA (NA);<br>Sedentary behavior (NA)                                                                                                                                             | 4 |
| 43 | Sehra, 2020, Public health        | Cross-sectional study    | L= United States; S= General/Not specified | N=22124-83745 (cell phone location data, daily observation); A=N/A; G= N/A | County; days; county factors (number of cases, days since order, rural, population); state factors (age group, black individuals, income, poverty, obesity, without insurance, state GDP, education, inpatient beds per capita, GDP spent on health care, population density) |  | <i>Objective measure</i><br>Daily cellphone activity compared with baseline over time by category of place (workplace, retail, parks, transit, grocery, residence);                                                                                                             | Descriptive statistics; Multivariable linear regression                                                                                             | Daily cellphone activity compared with baseline over time by category of place (NA)                                                                                                                          | 6 |
| 13 | Tison, 2020, Medical              | Cross-sectional study    | L= Worldwide; S= General/Not specified     | N= 19,144,639 (daily step count) A=N/A; G: N/A                             | Cities; country; operating system (Android or Apple)                                                                                                                                                                                                                          |  | <i>Objective measure</i><br>Mean daily steps (n and % change) by country                                                                                                                                                                                                        | Descriptive statistics                                                                                                                              | Mean daily steps (NA)                                                                                                                                                                                        | 3 |
| 56 | López-Bueno, 2020, Sustainability | Cross-sectional study    | L= Spain; S= General/Not specified         | N = 2042; A = 18+; G= Both                                                 | Demographics (age, gender, civil status, occupation, and education)                                                                                                                                                                                                           |  | <i>Subjective measure</i><br>Weekly PA minutes; Adherence to WHO PA guidelines                                                                                                                                                                                                  | Mc Nemar Chi-squared tests; independent and paired samples t-test; effect size (Cohen's d) ; receiver operating characteristic (ROC) curve analysis | Weekly PA minutes (o)<br>Adherence to WHO PA guidelines (o)                                                                                                                                                  | 4 |
| 76 | Rice, 2020, Urban ecology         | Cross-sectional analysis | L= United States; S= Urban and rural       | N= 1012; A= N/A; G= Both                                                   | Demographics (gender, ethnicity, country of residence, community classification of residence); Behaviors (Average frequency of outdoor recreation, Average distance traveled to                                                                                               |  | <i>Subjective measure</i><br><b>Rural vs Urban cluster vs Urban area residents</b><br>Outdoor recreation (frequency, days/week); Distance travelled to participate in outdoor recreation (per session); Distance travelled beyond roads during outdoor recreation (per session) | ANOVA                                                                                                                                               | <b>Rural vs Urban cluster vs Urban area residents</b><br>Outdoor recreation (o); Distance travelled to participate in outdoor recreation (o); Distance travelled beyond roads during outdoor recreation (o); | 4 |

|    |                                |                          |                                     |                                                     |                                                                                                                                             |                                                                                                                                                                                                                                                                                                                                    |                                                                                                                                                                                                                       |                                          |                                                                             |   |
|----|--------------------------------|--------------------------|-------------------------------------|-----------------------------------------------------|---------------------------------------------------------------------------------------------------------------------------------------------|------------------------------------------------------------------------------------------------------------------------------------------------------------------------------------------------------------------------------------------------------------------------------------------------------------------------------------|-----------------------------------------------------------------------------------------------------------------------------------------------------------------------------------------------------------------------|------------------------------------------|-----------------------------------------------------------------------------|---|
|    |                                |                          |                                     |                                                     | participate in outdoor recreation, Average distance traveled beyond roads during outdoor recreation, Average outdoor recreation group size) |                                                                                                                                                                                                                                                                                                                                    |                                                                                                                                                                                                                       |                                          |                                                                             |   |
| 70 | de Lannoy, 2020, Public Health | Cross-sectional analysis | L= Canada; S= General/Not specified | N=1472; A= 5-17; G= N/A                             | Province; policies facilitating access to outdoor spaces; policies restricting access to outdoor spaces; number of COVID- 19 cases          |                                                                                                                                                                                                                                                                                                                                    | <u>Subjective measure</u><br>Time spent outdoors (behavior change score);<br>Outdoor play (behavior change score)                                                                                                     | Descriptive statistics                   | Time spent outdoors (o);<br>Outdoor play (o);                               | 5 |
| 38 | Venter, 2020, Public Health    | Longitudinal Study       | L= Oslo, Norway; S= Urban           | N= STRAVA runner and cyclist users; A= N/A; G= N/A; | 3 years baseline average; Weather; Environmental covariates (Tree cover; vegetation greenness; trail remoteness); Land cover/use type;      | Recreational use of greenspaces increase in visits to parks and green spaces for both pedestrians and cyclists (+); Pedestrian increase and tree canopy/greenways (+); Cyclists use trails with greenness (0.2-0.6 NDVI), relative to a baseline preference for less green cover (work-related commutes to recreational purposes); | <u>Objective measure</u><br>Daily pedestrian (run, walk, hike) and cycling (bike) recreational activities recorded >> total activity counts per time interval; Walking and biking activities; Park/green space visits | Descriptive analysis; Linear regression; | Walking and biking (o); Park/green space visits (o); Outdoor recreation (o) | 5 |

**Note:**

Sallis JF, Johnson M, Calfas KJ et al. Assessing perceived physical environment variables that may influence physical activity. *Res Q Exerc Sport*. 1997; 68:345-351.  
 Ross, C. E., & Mirowsky, J. (1999). Disorder and decay: The concept and measurement of perceived neighborhood disorder. *Urban Affairs Review*, 34, 412–432.  
 Coulton, C. J., Korbin, J. E., & Su, M. (2002). Measuring Neighborhood Context for Young Children in an Urban Area. In T. Revenson, A. D’Augelli, S. French, D. Hughes, D. Livert, E. Seidman, M. Shinn, & H. Yoshikawa (Eds.), *Ecological Research to Promote Social Change* (pp. 99-126): Springer US.

**References:**

Ammar, A., Brach, M., Trabelsi, K., Chtourou, H., Boukhris, O., Masmoudi, L., . . . Ahmed, M. (2020). Effects of COVID-19 home confinement on physical activity and eating behaviour Preliminary results of the ECLB-COVID19 international online-survey. *MedRxiv*.

- Assaloni, R., Pellino, V. C., Puci, M. V., Ferraro, O. E., Lovecchio, N., Girelli, A., & Vandoni, M. (2020). Coronavirus disease (Covid-19): how does the exercise practice in active people with type 1 diabetes change? A preliminary survey. *diabetes research and clinical practice*, *166*, 108297.
- Azizi, A., Achak, D., Aboudi, K., Saad, E., Nejjari, C., Noura, Y., . . . Marfak, A. (2020). Health-related quality of life and behavior-related lifestyle changes due to the COVID-19 home confinement: Dataset from a Moroccan sample. *Data in brief*, *32*, 106239.
- Beck, M. J., & Hensher, D. A. (2020). Insights into the impact of COVID-19 on household travel and activities in Australia—The early days under restrictions. *Transport policy*, *96*, 76-93.
- Biviá-Roig, G., La Rosa, V. L., Gómez-Tébar, M., Serrano-Raya, L., Amer-Cuenca, J. J., Caruso, S., . . . Lisón, J. F. (2020). Analysis of the impact of the confinement resulting from COVID-19 on the lifestyle and psychological wellbeing of Spanish pregnant women: an Internet-based cross-sectional survey. *International journal of environmental research and public health*, *17*(16), 5933.
- Bourdas, D. I., & Zacharakis, E. D. (2020). Evolution of changes in physical activity over lockdown time: Physical activity datasets of four independent adult sample groups corresponding to each of the last four of the six COVID-19 lockdown weeks in Greece. *Data in brief*, *32*, 106301.
- Cancello, R., Soranna, D., Zambra, G., Zambon, A., & Invitti, C. (2020). Determinants of the lifestyle changes during COVID-19 pandemic in the residents of Northern Italy. *International journal of environmental research and public health*, *17*(17), 6287.
- Carroll, N., Sadowski, A., Laila, A., Hruska, V., Nixon, M., Ma, D. W., & Haines, J. (2020). The impact of COVID-19 on health behavior, stress, financial and food security among middle to high income Canadian families with young children. *Nutrients*, *12*(8), 2352.
- Castañeda-Babarro, A., Arbillaga-Etxarri, A., Gutiérrez-Santamaría, B., & Coca, A. (2020). Physical activity change during COVID-19 confinement. *International journal of environmental research and public health*, *17*(18), 6878.
- Colley, R. C., Bushnik, T., & Langlois, K. (2020). Exercise and screen time during the COVID-19 pandemic. *Health Rep*, *31*(6), 3-11.
- Constandt, B., Thibaut, E., De Bosscher, V., Scheerder, J., Ricour, M., & Willem, A. (2020). Exercising in times of lockdown: an analysis of the impact of COVID-19 on levels and patterns of exercise among adults in Belgium. *International journal of environmental research and public health*, *17*(11), 4144.
- Cransac-Miet, A., Zeller, M., Chagué, F., Faure, A. S., Bichat, F., Danchin, N., . . . Cottin, Y. (2021). Impact of COVID-19 lockdown on lifestyle adherence in stay-at-home patients with chronic coronary syndromes: Towards a time bomb. *International Journal of Cardiology*, *323*, 285-287.
- Day, B. H. (2020). The value of greenspace under pandemic lockdown. *Environmental and Resource Economics*, *76*(4), 1161-1185.
- de Lannoy, L., Rhodes, R. E., Moore, S. A., Faulkner, G., & Tremblay, M. S. (2020). Regional differences in access to the outdoors and outdoor play of Canadian children and youth during the COVID-19 outbreak. *Canadian Journal of Public Health*, *111*(6), 988-994.
- Di Sebastiano, K. M., Chulak-Bozzer, T., Vanderloo, L. M., & Faulkner, G. (2020). Don't walk so close to me: physical distancing and adult physical activity in Canada. *Frontiers in psychology*, *11*, 1895.
- Di Stefano, V., Battaglia, G., Giustino, V., Gagliardo, A., D'Aleo, M., Giannini, O., . . . Brighina, F. (2021). Significant reduction of physical activity in patients with neuromuscular disease during COVID-19 pandemic: the long-term consequences of quarantine. *Journal of Neurology*, *268*(1), 20-26.
- Đogaš, Z., Lušić Kalcina, L., Pavlinac Dodig, I., Demirović, S., Madirazza, K., Valić, M., & Pecotić, R. (2020). The effect of COVID-19 lockdown on lifestyle and mood in Croatian general population: a cross-sectional study. *Croatian medical journal*, *61*(4), 309-318.
- Dunton, G. F., Do, B., & Wang, S. D. (2020). Early effects of the COVID-19 pandemic on physical activity and sedentary behavior in children living in the US. *BMC Public Health*, *20*(1), 1-13.
- Elran-Barak, R., & Mozeikov, M. (2020). One month into the reinforcement of social distancing due to the COVID-19 outbreak: subjective health, health behaviors, and loneliness among people with chronic medical conditions. *International journal of environmental research and public health*, *17*(15), 5403.
- Fong, B. Y., Wong, M., Law, V. T., Lo, M. F., Ng, T. K., Yee, H. H., . . . Ho, P. W. (2020). Relationships between physical and social behavioural changes and the mental status of homebound residents in Hong Kong during the COVID-19 pandemic. *International journal of environmental research and public health*, *17*(18), 6653.
- Gallè, F., Sabella, E. A., Da Molin, G., De Giglio, O., Caggiano, G., Di Onofrio, V., . . . Orsi, G. B. (2020). Understanding knowledge and behaviors related to CoViD-19 epidemic in Italian undergraduate students: the EPICO study. *International journal of environmental research and public health*, *17*(10), 3481.

- Gallè, F., Sabella, E. A., Ferracuti, S., De Giglio, O., Caggiano, G., Protano, C., . . . Liguori, G. (2020). Sedentary behaviors and physical activity of Italian undergraduate students during lockdown at the time of CoViD- 19 pandemic. *International journal of environmental research and public health*, 17(17), 6171.
- Gallo, L. A., Gallo, T. F., Young, S. L., Moritz, K. M., & Akison, L. K. (2020). The impact of isolation measures due to COVID-19 on energy intake and physical activity levels in Australian university students. *Nutrients*, 12(6), 1865.
- Ghosh, A., Arora, B., Gupta, R., Anoop, S., & Misra, A. (2020). Effects of nationwide lockdown during COVID-19 epidemic on lifestyle and other medical issues of patients with type 2 diabetes in north India. *Diabetes & Metabolic Syndrome: Clinical Research & Reviews*, 14(5), 917-920.
- Gilic, B., Ostojic, L., Corluka, M., Volaric, T., & Sekulic, D. (2020). Contextualizing Parental/Familial influence on physical activity in adolescents before and during COVID-19 pandemic: a prospective analysis. *Children*, 7(9), 125.
- Hemphill, N. M., Kuan, M. T., & Harris, K. C. (2020). Reduced physical activity during COVID-19 pandemic in children with congenital heart disease. *Canadian Journal of Cardiology*, 36(7), 1130-1134.
- Lesser, I. A., & Nienhuis, C. P. (2020). The impact of COVID-19 on physical activity behavior and well-being of Canadians. *International journal of environmental research and public health*, 17(11), 3899.
- López-Bueno, R., Calatayud, J., Andersen, L. L., Balsalobre-Fernández, C., Casaña, J., Casajús, J. A., . . . López-Sánchez, G. F. (2020). Immediate impact of the COVID-19 confinement on physical activity levels in Spanish adults. *Sustainability*, 12(14), 5708.
- López-Bueno, R., Calatayud, J., Casaña, J., Casajús, J. A., Smith, L., Tully, M. A., . . . López-Sánchez, G. F. (2020). COVID-19 confinement and health risk behaviors in Spain. *Frontiers in psychology*, 11, 1426.
- López-Sánchez, G. F., López-Bueno, R., Gil-Salmerón, A., Zauder, R., Skalska, M., Jastrzębska, J., . . . Tully, M. A. (2021). Comparison of physical activity levels in Spanish adults with chronic conditions before and during COVID-19 quarantine. *European journal of public health*, 31(1), 161-166.
- Majumdar, P., Biswas, A., & Sahu, S. (2020). COVID-19 pandemic and lockdown: cause of sleep disruption, depression, somatic pain, and increased screen exposure of office workers and students of India. *Chronobiology international*, 37(8), 1191-1200.
- Meyer, J., McDowell, C., Lansing, J., Brower, C., Smith, L., Tully, M., & Herring, M. (2020). Changes in physical activity and sedentary behavior in response to COVID-19 and their associations with mental health in 3052 US adults. *International journal of environmental research and public health*, 17(18), 6469.
- Mitra, R., Moore, S. A., Gillespie, M., Faulkner, G., Vanderloo, L. M., Chulak-Bozzer, T., . . . Tremblay, M. S. (2020). Healthy movement behaviours in children and youth during the COVID-19 pandemic: Exploring the role of the neighbourhood environment. *Health & place*, 65, 102418.
- Moore, S. A., Faulkner, G., Rhodes, R. E., Brussoni, M., Chulak-Bozzer, T., Ferguson, L. J., . . . Vanderloo, L. M. (2020). Impact of the COVID-19 virus outbreak on movement and play behaviours of Canadian children and youth: a national survey. *International Journal of Behavioral Nutrition and Physical Activity*, 17(1), 1-11.
- Ong, J. L., Lau, T., Massar, S. A., Chong, Z. T., Ng, B. K., Koek, D., . . . Chee, M. W. (2021). COVID-19-related mobility reduction: heterogenous effects on sleep and physical activity rhythms. *Sleep*, 44(2), zsaal179.
- Park, J. (2020). Changes in subway ridership in response to COVID-19 in Seoul, South Korea: Implications for social distancing. *Cureus*, 12(4).
- Park, S., Kim, B., & Lee, J. (2020). <? covid19?> Social Distancing and Outdoor Physical Activity During the COVID-19 Outbreak in South Korea: Implications for Physical Distancing Strategies. *Asia Pacific Journal of Public Health*, 32(6-7), 360-362.
- Pépin, J. L., Bruno, R. M., Yang, R.-Y., Vercamer, V., Jouhaud, P., Escourrou, P., & Boutouyrie, P. (2020). Wearable activity trackers for monitoring adherence to home confinement during the COVID-19 pandemic worldwide: data aggregation and analysis. *Journal of Medical Internet Research*, 22(6), e19787.
- Phillipou, A., Meyer, D., Neill, E., Tan, E. J., Toh, W. L., Van Rheenen, T. E., & Rossell, S. L. (2020). Eating and exercise behaviors in eating disorders and the general population during the COVID-19 pandemic in Australia: Initial results from the COLLATE project. *International Journal of Eating Disorders*, 53(7), 1158-1165.
- Pietrobelli, A., Pecoraro, L., Ferruzzi, A., Heo, M., Faith, M., Zoller, T., . . . Heymsfield, S. B. (2020). Effects of COVID-19 lockdown on lifestyle behaviors in children with obesity living in Verona, Italy: a longitudinal study. *Obesity*, 28(8), 1382-1385.
- Pišot, S., Milovanović, I., Šimunić, B., Gentile, A., Bosnar, K., Prot, F., . . . Katović, D. (2020). Maintaining everyday life praxis in the time of COVID-19 pandemic measures (ELP-COVID-19 survey). *European journal of public health*, 30(6), 1181-1186.

- Qi, M., Li, P., Moyle, W., Weeks, B., & Jones, C. (2020). Physical activity, health-related quality of life, and stress among the Chinese adult population during the COVID-19 pandemic. *International journal of environmental research and public health*, 17(18), 6494.
- Rice, W. L., Mateer, T. J., Reigner, N., Newman, P., Lawhon, B., & Taff, B. D. (2020). Changes in recreational behaviors of outdoor enthusiasts during the COVID-19 pandemic: analysis across urban and rural communities. *Journal of Urban Ecology*, 6(1), juaa020.
- Romero-Blanco, C., Rodríguez-Almagro, J., Onieva-Zafra, M. D., Parra-Fernández, M. L., Prado-Laguna, M. D. C., & Hernández-Martínez, A. (2020). Physical activity and sedentary lifestyle in university students: changes during confinement due to the COVID-19 pandemic. *International journal of environmental research and public health*, 17(18), 6567.
- Ruíz-Roso, M. B., de Carvalho Padilha, P., Matilla-Escalante, D. C., Brun, P., Ulloa, N., Acevedo-Correa, D., . . . de Oliveira Cardoso, L. (2020). Changes of physical activity and ultra-processed food consumption in adolescents from different countries during Covid-19 pandemic: An observational study. *Nutrients*, 12(8), 2289.
- Ruiz-Roso, M. B., Knott-Torcal, C., Matilla-Escalante, D. C., Garcimartín, A., Sampedro-Nuñez, M. A., Dávalos, A., & Marazuela, M. (2020). COVID-19 lockdown and changes of the dietary pattern and physical activity habits in a cohort of patients with type 2 diabetes mellitus. *Nutrients*, 12(8), 2327.
- Saha, J., Barman, B., & Chouhan, P. (2020). Lockdown for COVID-19 and its impact on community mobility in India: An analysis of the COVID-19 Community Mobility Reports, 2020. *Children and youth services review*, 116, 105160.
- Sánchez-Sánchez, E., Ramírez-Vargas, G., Avellaneda-López, Y., Orellana-Pecino, J. I., García-Marín, E., & Díaz-Jimenez, J. (2020). Eating habits and physical activity of the Spanish population during the COVID-19 pandemic period. *Nutrients*, 12(9), 2826.
- Sassone, B., Mandini, S., Grazi, G., Mazzoni, G., Myers, J., & Pasanisi, G. (2020). Impact of COVID-19 pandemic on physical activity in patients with implantable cardioverter-defibrillators. *Journal of cardiopulmonary rehabilitation and prevention*, 40(5), 285.
- Schnitzer, M., Schöttl, S. E., Kopp, M., & Barth, M. (2020). COVID-19 stay-at-home order in Tyrol, Austria: sports and exercise behaviour in change? *Public Health*, 185, 218-220.
- Sehra, S. T., George, M., Wiebe, D. J., Fundin, S., & Baker, J. F. (2020). Cell phone activity in categories of places and associations with growth in cases of COVID-19 in the US. *JAMA Internal Medicine*, 180(12), 1614-1620.
- Srivastav, A. K., Sharma, N., & Samuel, A. J. (2021). Impact of Coronavirus disease-19 (COVID-19) lockdown on physical activity and energy expenditure among physiotherapy professionals and students using web-based open E-survey sent through WhatsApp, Facebook and Instagram messengers. *Clinical Epidemiology and Global Health*, 9, 78-84.
- Sun, S., Folarin, A. A., Ranjan, Y., Rashid, Z., Conde, P., Stewart, C., . . . Simblett, S. (2020). Using smartphones and wearable devices to monitor behavioral changes during COVID-19. *Journal of Medical Internet Research*, 22(9), e19992.
- Suzuki, Y., Maeda, N., Hirado, D., Shirakawa, T., & Urabe, Y. (2020). Physical activity changes and its risk factors among community-dwelling Japanese older adults during the COVID-19 epidemic: associations with subjective well-being and health-related quality of life. *International journal of environmental research and public health*, 17(18), 6591.
- Tison, G. H., Avram, R., Kuhar, P., Abreau, S., Marcus, G. M., Pletcher, M. J., & Olgin, J. E. (2020). Worldwide effect of COVID-19 on physical activity: a descriptive study. *Annals of internal medicine*, 173(9), 767-770.
- Van Nguyen, D., Pham, G. H., & Nguyen, D. N. (2020). Impact of the Covid-19 pandemic on perceptions and behaviors of university students in Vietnam. *Data in brief*, 31, 105880.
- Venter, Z. S., Barton, D. N., Gundersen, V., Figari, H., & Nowell, M. (2020). Urban nature in a time of crisis: recreational use of green space increases during the COVID-19 outbreak in Oslo, Norway. *Environmental research letters*, 15(10), 104075.
- Vetrovsky, T., Frybova, T., Gant, I., Semerad, M., Cimler, R., Bunc, V., . . . Griva, M. (2020). The detrimental effect of COVID-19 nationwide quarantine on accelerometer-assessed physical activity of heart failure patients. *ESC heart failure*, 7(5), 2093-2097.
- Yamada, K., Yamaguchi, S., Sato, K., Fuji, T., & Ohe, T. (2020). The COVID-19 outbreak limits physical activities and increases sedentary behavior: A possible secondary public health crisis for the elderly. *Journal of Orthopaedic Science*, 25(6), 1093.
- Yang, Y., & Koenigstorfer, J. (2020). Determinants of physical activity maintenance during the Covid-19 pandemic: a focus on fitness apps. *Translational behavioral medicine*, 10(4), 835-842.

Zheng, C., Huang, W. Y., Sheridan, S., Sit, C. H.-P., Chen, X.-K., & Wong, S. H.-S. (2020). COVID-19 pandemic brings a sedentary lifestyle in young adults: a cross-sectional and longitudinal study. *International journal of environmental research and public health*, 17(17), 6035.
